# Supplementary material for: Thick-tissue bioreactor as a platform for long-term organotypic culture and drug delivery
Source: Royal Society of Chemistry journal article supplement (doi:10.1039/c2lc40304h), 2012-01-01

# Supplemental

Supplemental Figure S1

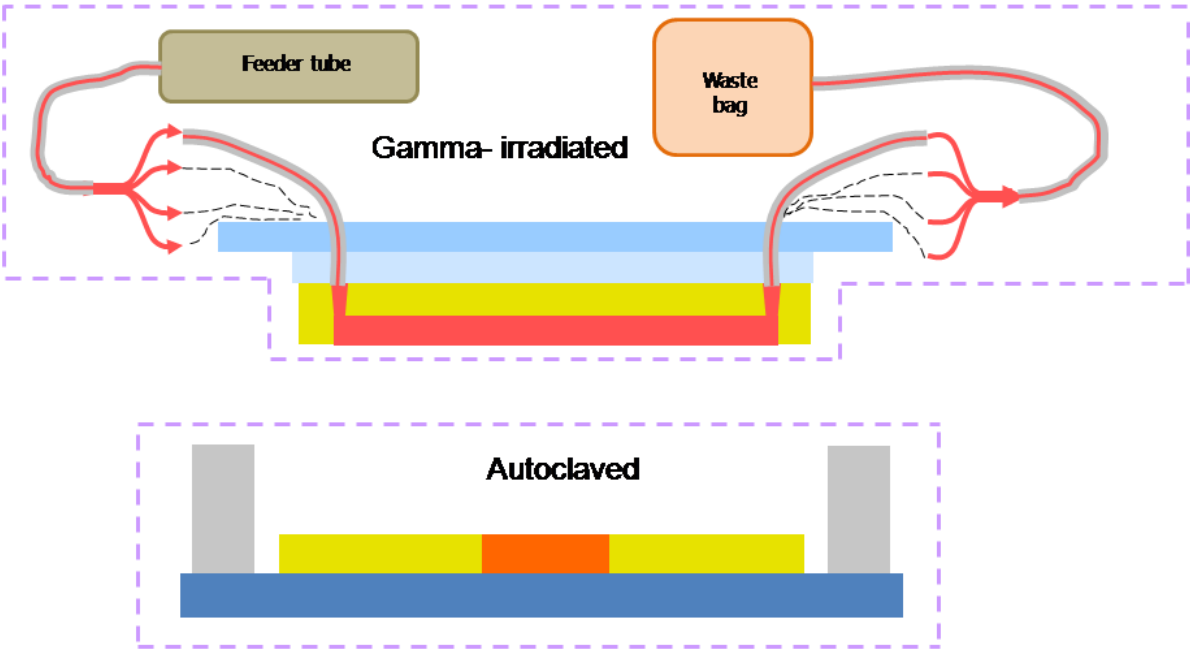

**Supplemental Figure S2**

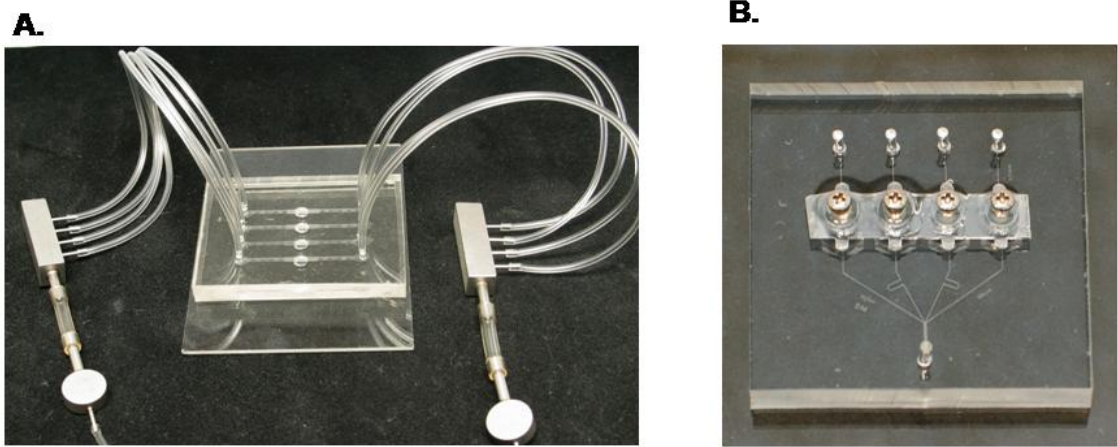

Supplemental Figure S3

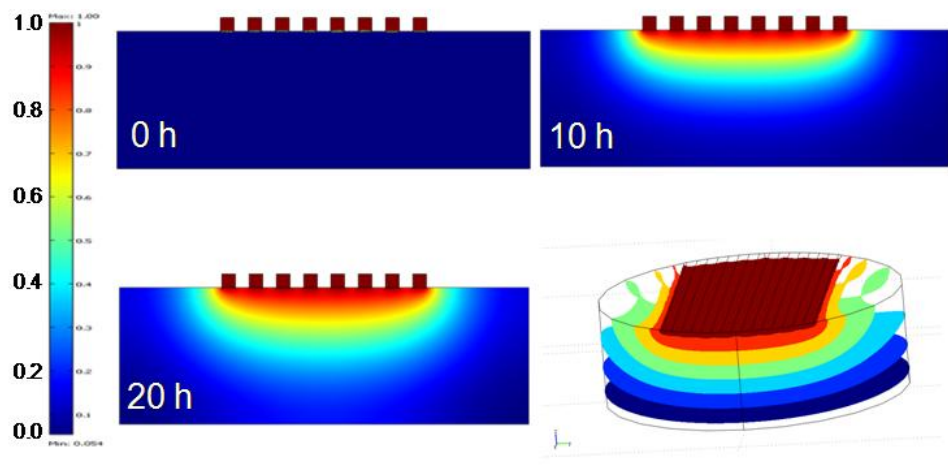

Supplemental Figure S4

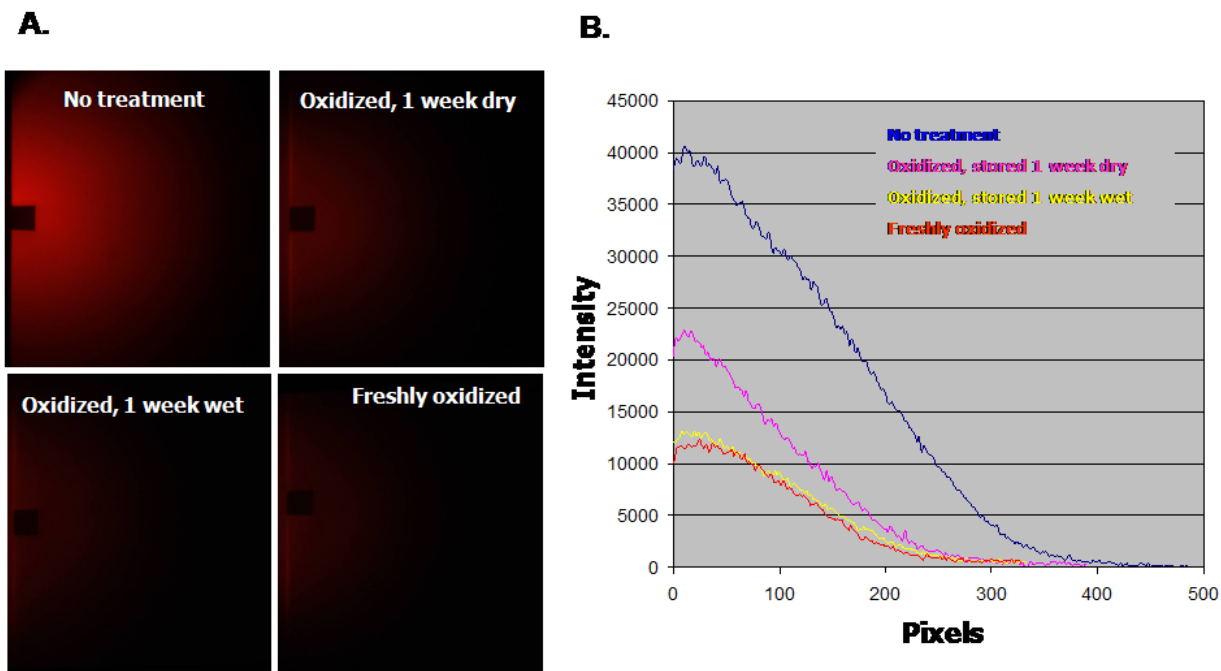

Supplemental Figure S5A

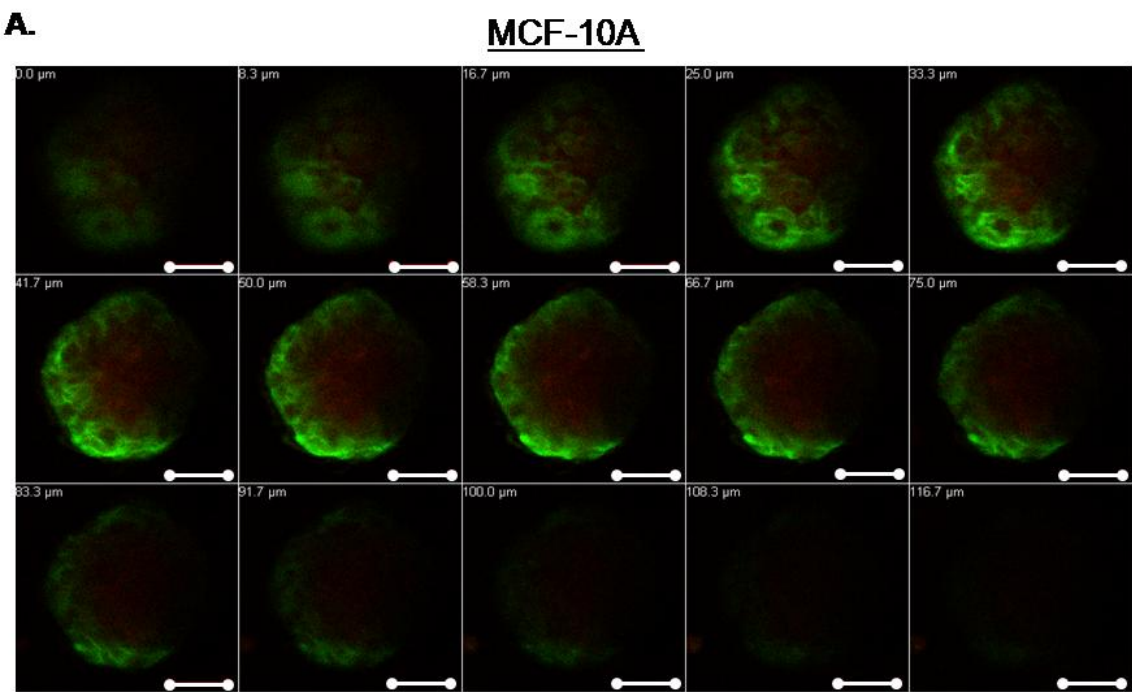

Supplemental Figure S5B

B.

MCF-10AT1

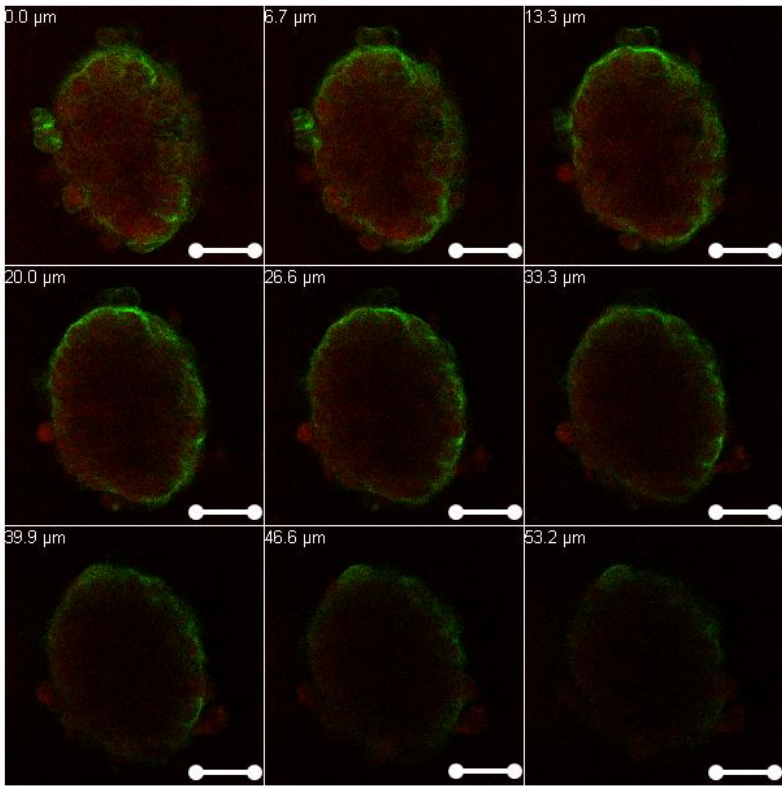

Supplemental Figure S5C

C.

MCF-10 CA 1d

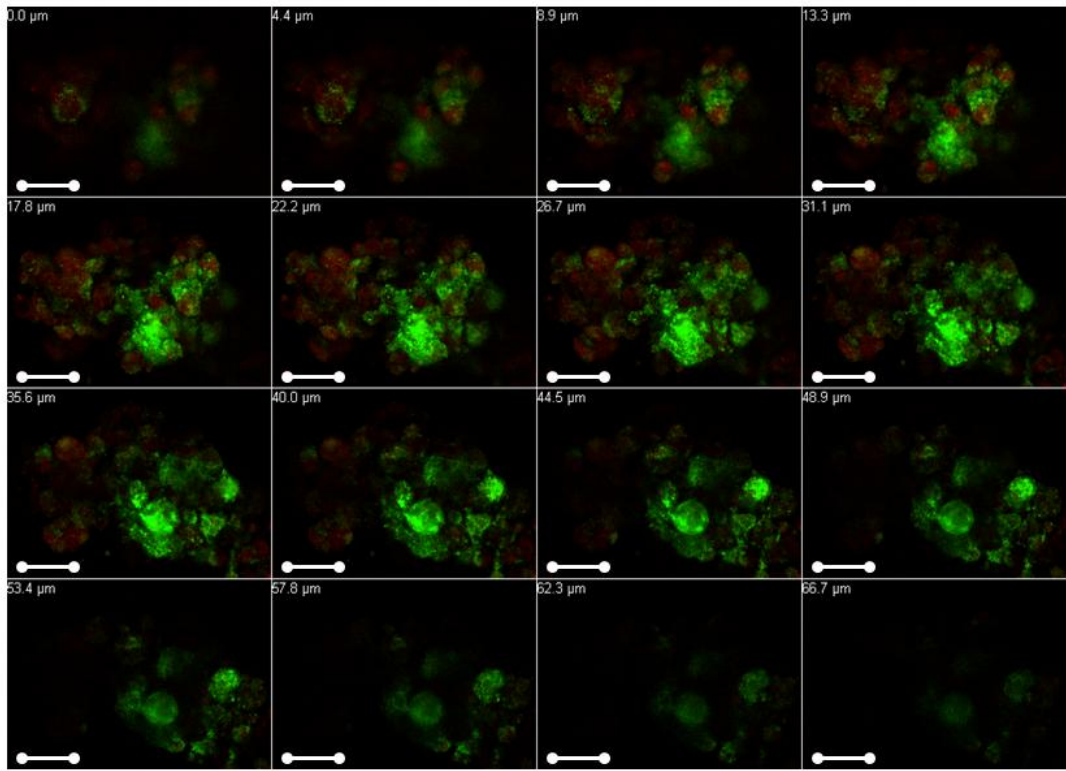



Supplemental Figure S6

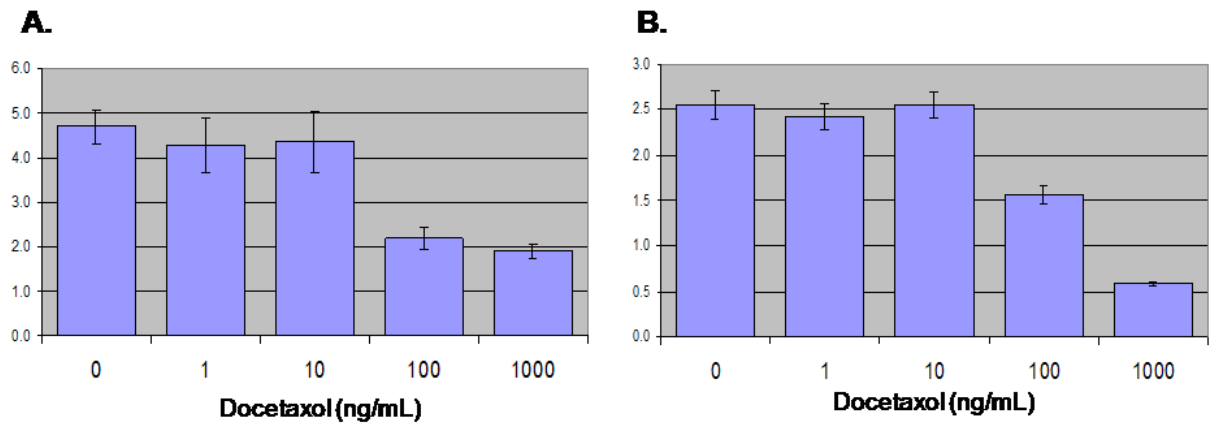

**Supplemental Figure S7**

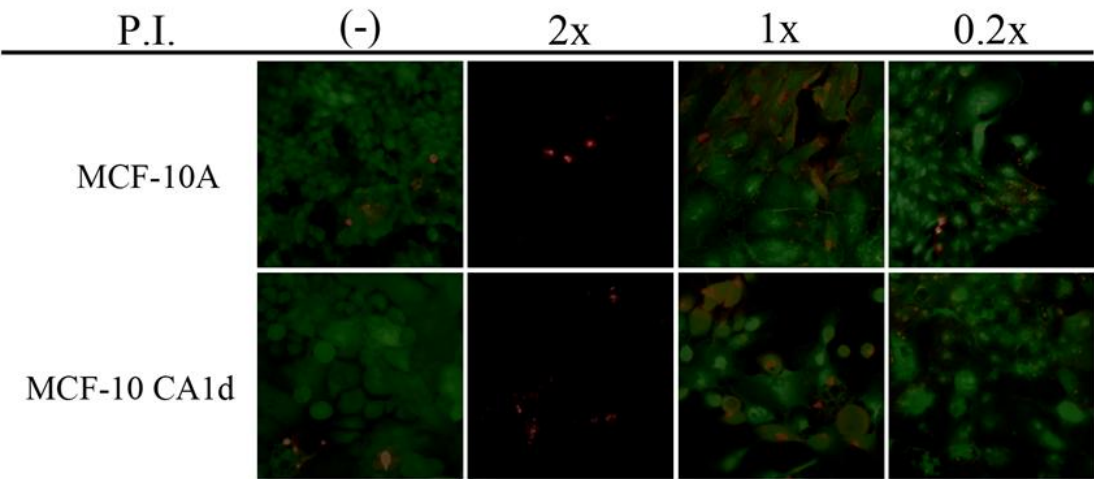

Supplement: c2lc40304h.pdf [file c2lc40304h.pdf]
